# Supplementary material
Source: PubMed Central journal article supplement (PMC3089031)

## SUPPLEMENTAL TABLE AND FIGURE LEGENDS

**Supplemental Table 1.** Genes misregulated ( $P < 0.01$ ) in the *Tg(shRxfp2)*, *Rxfp2*<sup>+/-</sup> cryptorchid cremasteric sac versus the wild-type *Rxfp2*<sup>+/-</sup> cremasteric sac identified using Illumina's MouseRef-8 v2.0 Expression BeadChip array.

**Supplemental Fig. 1.** Analysis of *Rxfp2* down-regulation by four siRNA constructs. The Hec293T cells were transfected with the psiCheck2-*Rxfp2* reporter expression construct and negative control siRNA (siNC) or siRNAs targeting *Rxfp2*. The relative expression of *Rxfp2* was calculated as a ratio of Firefly and Renilla luciferase activity. For all siRNAs, the difference versus control is significant ( $P < 0.0001$ ).

**Supplemental Fig. 2.** Analysis of *Rarb-cre* expression in cremasteric sac at day P12. The expression of Cre recombinase leads to an activation of  $\beta$ -Gal activity of the Rosa26 allele and blue staining. The gonadal ligament (GL) and cremaster muscles of cremasteric sac (CS) demonstrate an expression of *Rarb-cre*.

**Supplemental Fig. 3.** Relative *Rxfp2* gene expression in cremasteric sac of control *Tg(shRxfp2)*, *Rxfp2*<sup>+/-</sup> mice (red; n=4); *Tg(shRxfp2)*, *Rarb-cre*, *Rxfp2*<sup>+/-</sup> mice without cryptorchidism (white; n=3) and with *Tg(shRxfp2)*, *Rarb-cre*, *Rxfp2*<sup>+/-</sup> male with cryptorchidism (black; n=1).

*Rosa26*

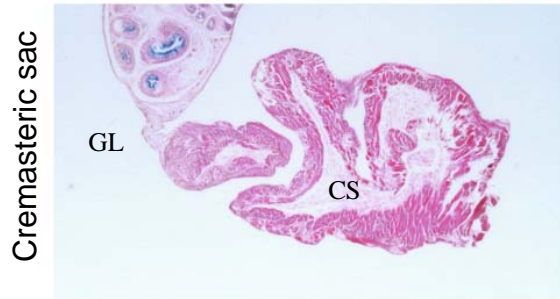

*Rosa26, Rarb-cre*

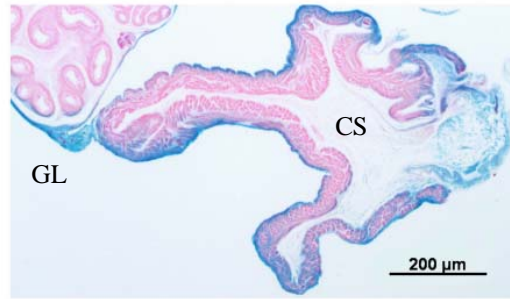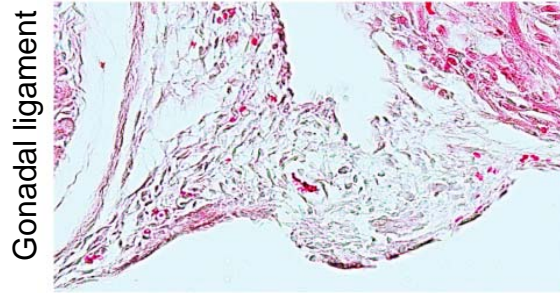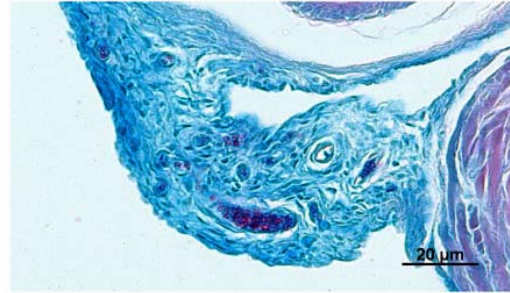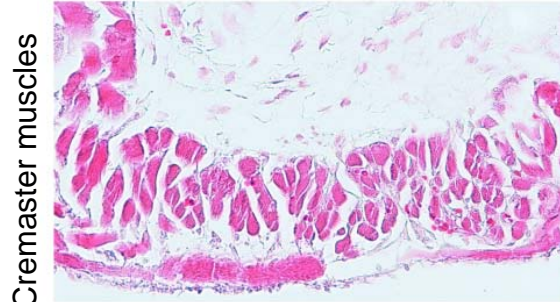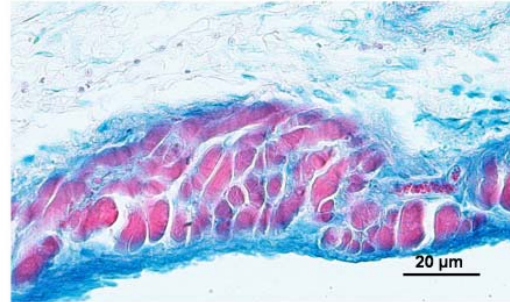

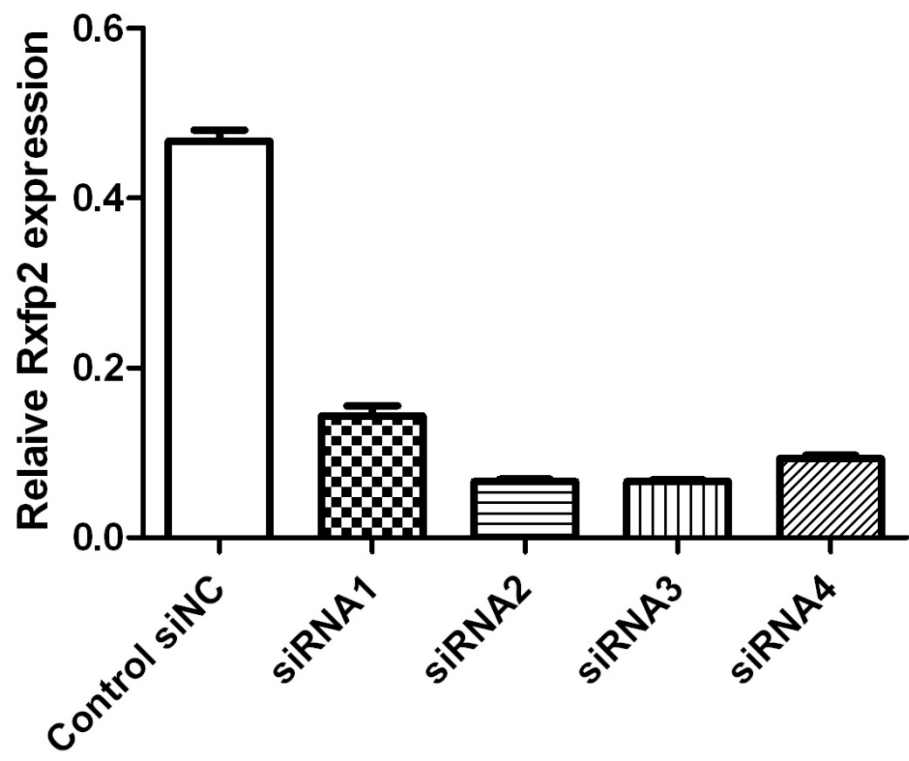

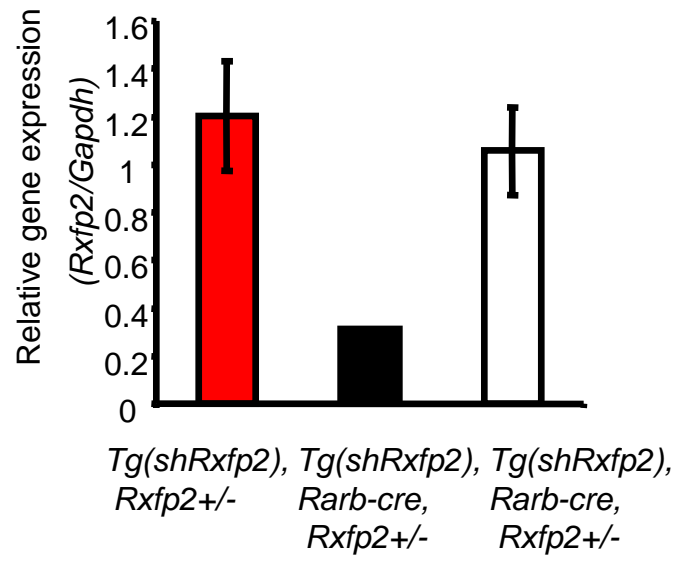

Supplement: me.2010-0330_1.pdf [file me.2010-0330_1.pdf]
